# Supplementary material for: In vivo genome-wide CRISPR screening in murine acute myeloid leukemia uncovers microenvironmental dependencies
Source: PubMed Central journal article supplement — Blood Adv. 2022 Aug 31;6(17):5072–84. doi: 10.1182/bloodadvances.2022007250 (PMC9631646; doi:10.1182/bloodadvances.2022007250), 2022-08-31
Supplement: advancesADV2022007250-suppl7.pdf [file advancesADV2022007250-suppl7.pdf]

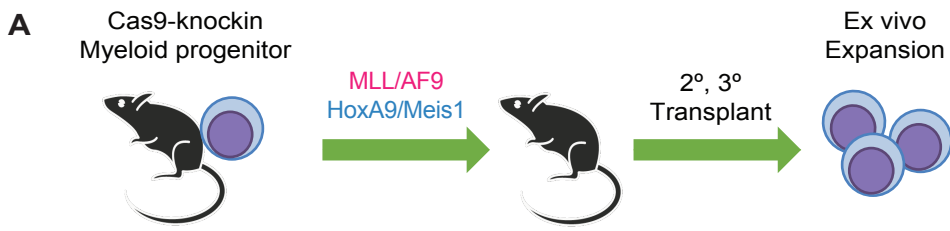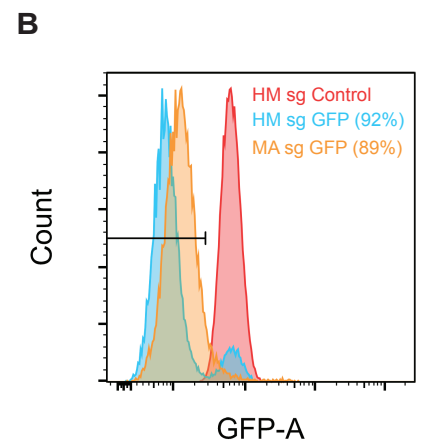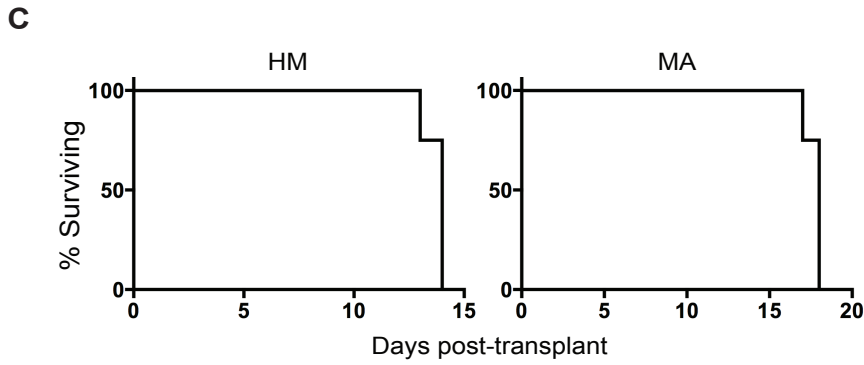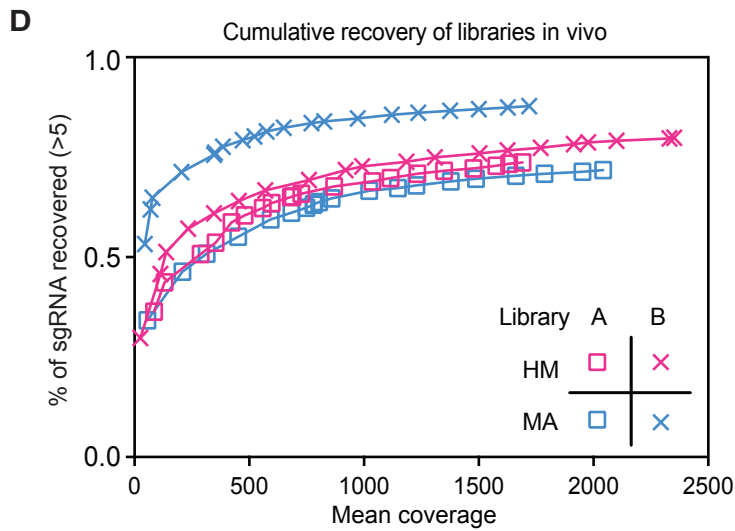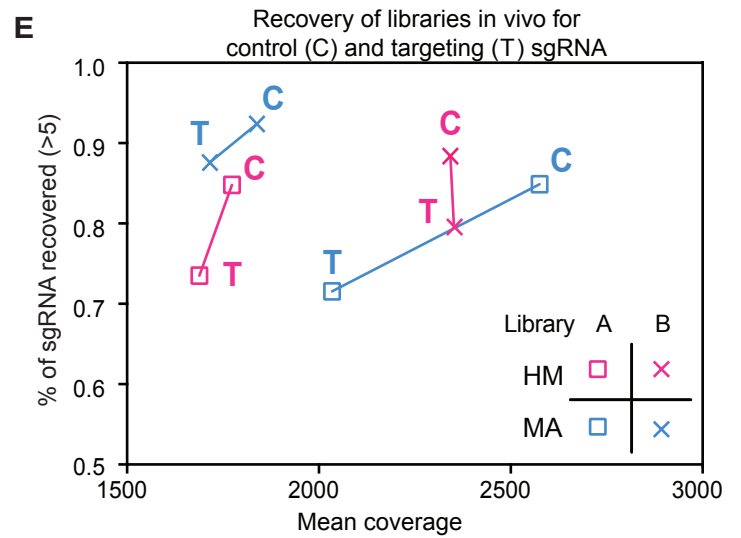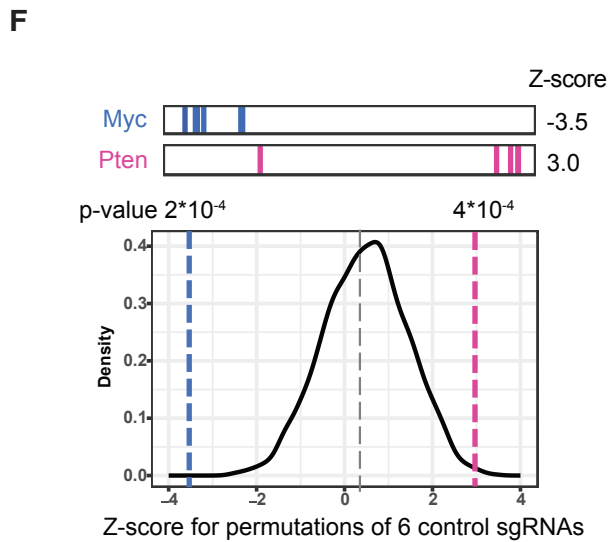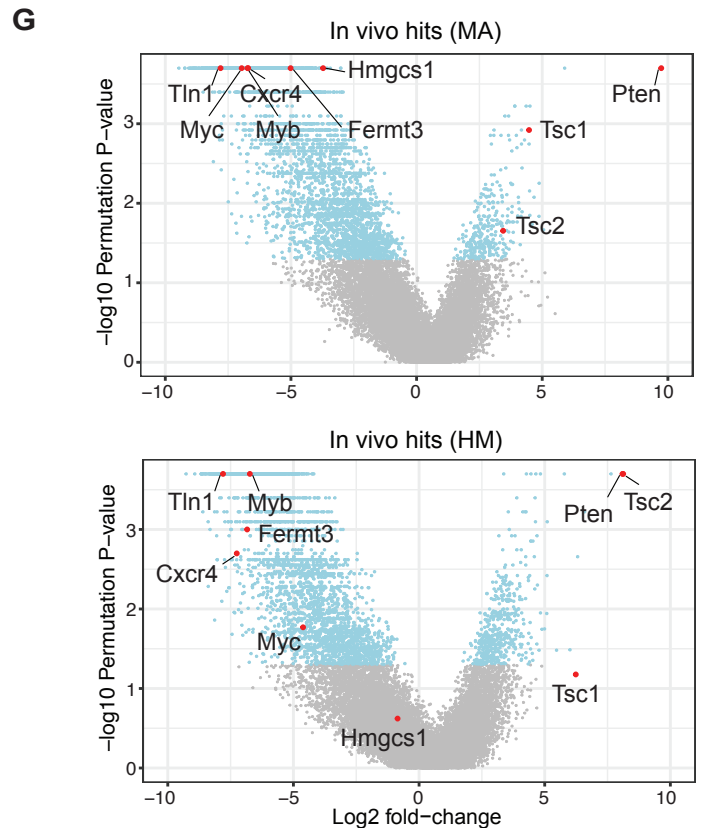

### **Supplementary Figure 1. AML in vivo screening models**

(A) Schematic of AML model development.

(B) Loss of GFP expression in both HM and MA model after lentiviral transduction with sgRNA targeting GFP.

(C) Survival curves of C57Bl/6J recipient mice transplanted with 10 million HM or MA cells.

(D) Fraction of libraries detected more often than 5 NGS reads (y-axis) in relation to mean coverage (average sequencing depth, x-axis), when sequencing output from individual mice is cumulated.

(E) Fraction of libraries detected more often than 5 NGS reads (y-axis) in relation to mean coverage (average sequencing depth, x-axis), analyzing separately guide sequences that are targeting a gene or non-targeting controls.

(F) (top) Mann-Whitney Z-scores of representative essential (Myc) and tumor suppressor (Pten) genes, calculated according to the ranking of Log2FC values for 6 sgRNAs targeting each gene.

(bottom) Distribution of Mann-Whitney Z-scores created by 1,000 permutations of 6 rankings of non-targeting sgRNAs

(G) For every gene screened, median log<sub>2</sub>-transformed fold change (log<sub>2</sub>FC) of sgRNA representation (x-axis) and estimates of statistical significance (minus-log<sub>10</sub>-transformed permutation P-values; y-axis). Blue dots highlight genes with  $p < 0.05$ .

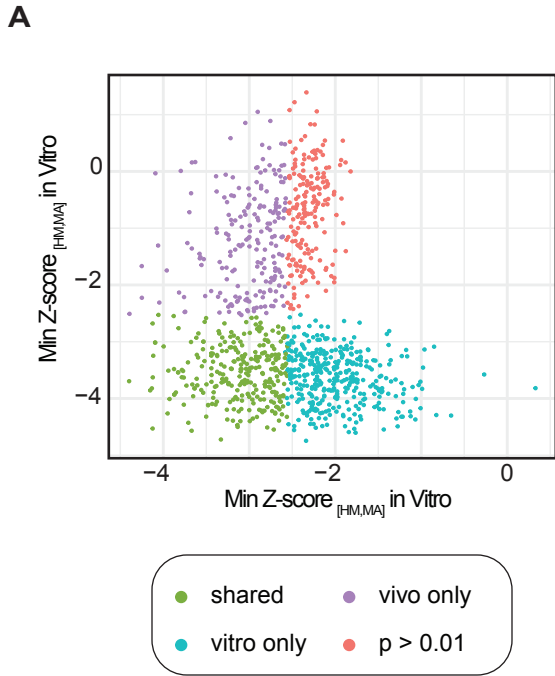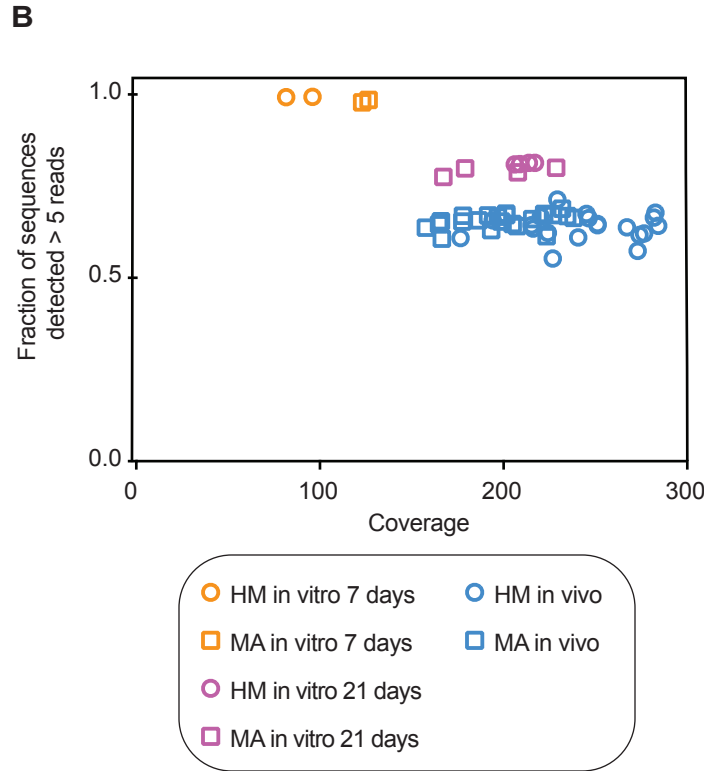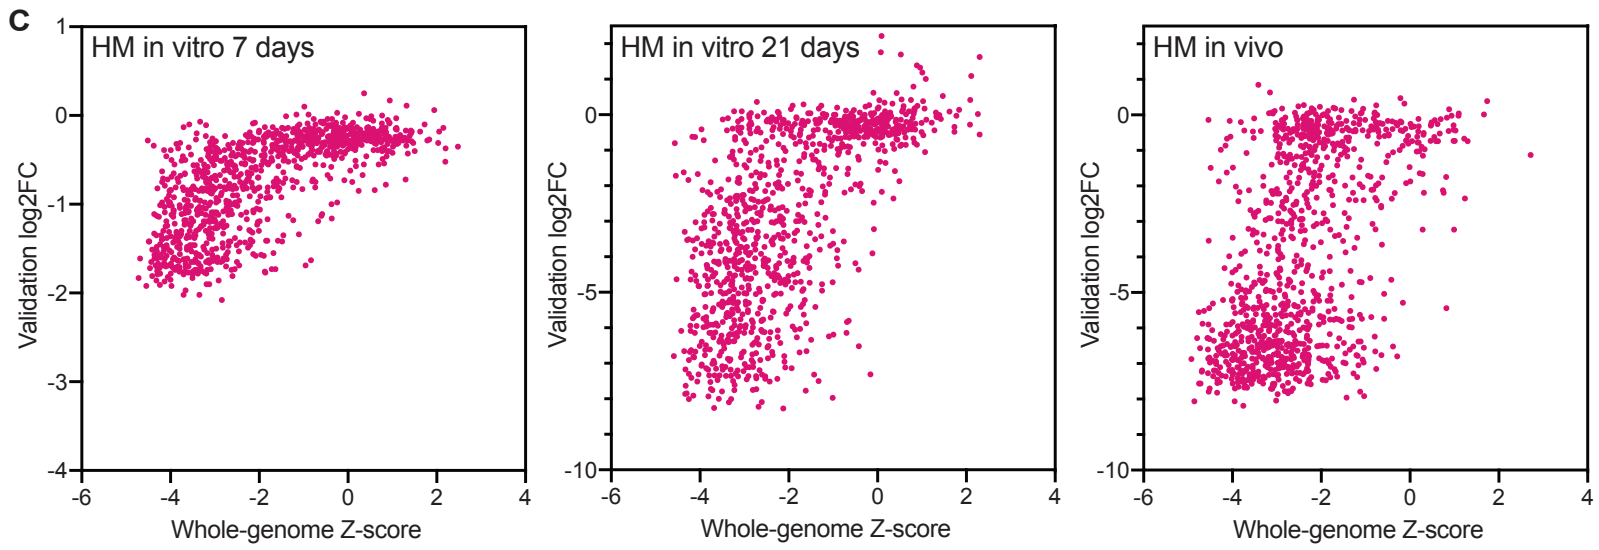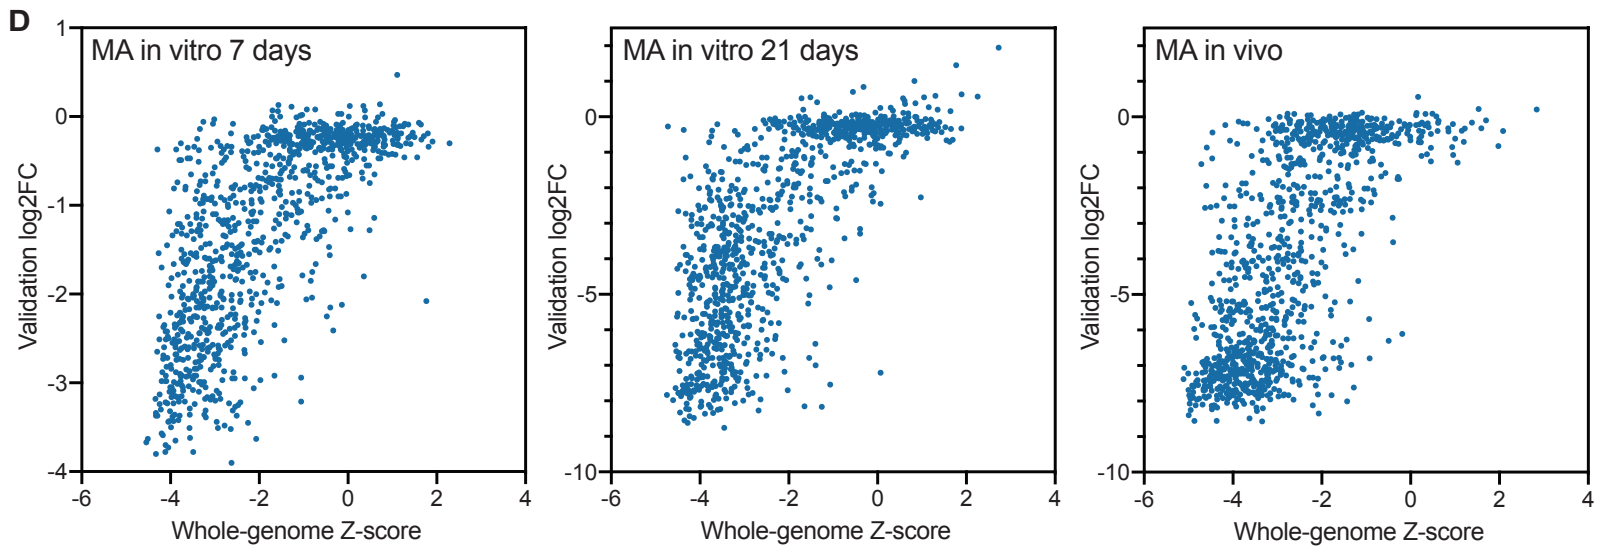

**Supplementary Figure 2. Validation in vivo CRISPR screening**

(A) For every gene selected for re-screening, lowest Z-score obtained between HM or MA screens, in vitro and in vivo

(B) Fraction of libraries detected more often than 5 NGS reads (y-axis) in relation to coverage (average sequencing depth, x-axis), in individual replicates according to condition

(C) For every gene re-screened, relation between genome-wide CRISPR screen (Z-scores; x-axis) and validation screen (median Log2FC values; y-axis), in each condition.

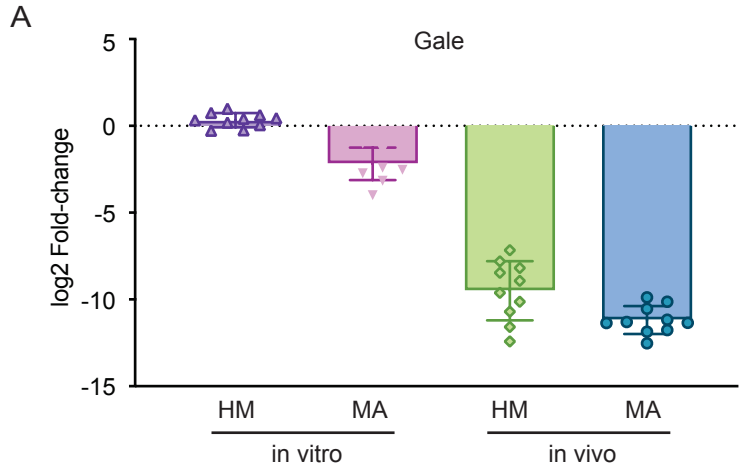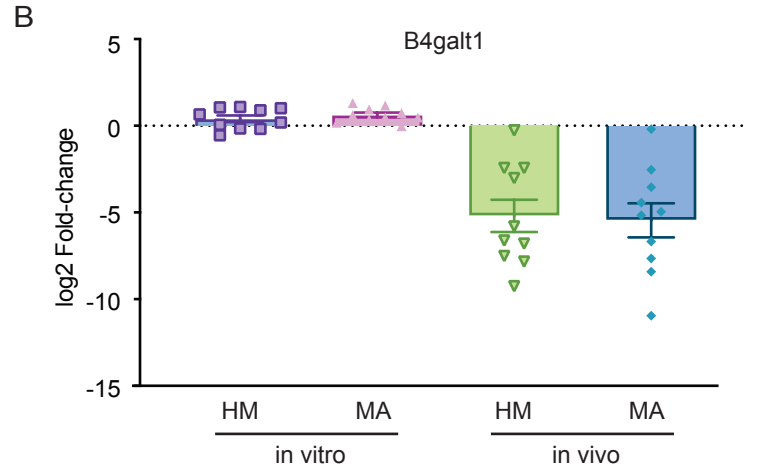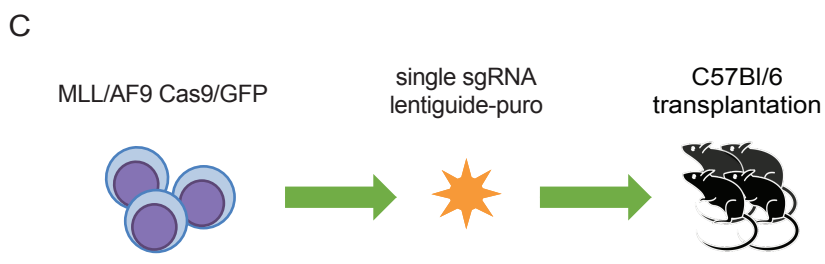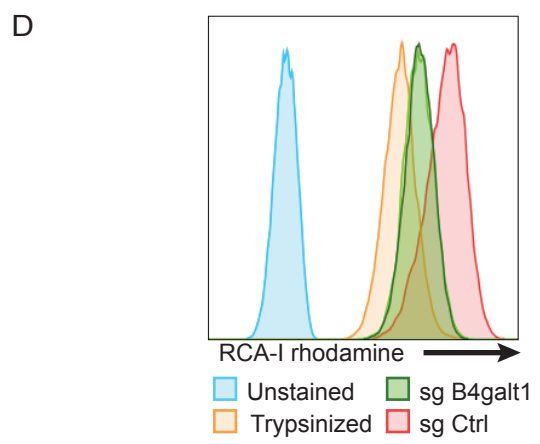

**Supplementary Figure 3. Essentiality of B4galt1 and Gale in vivo and in vitro**

- (A) Log<sub>2</sub>FC values of individual sgRNAs targeting Gale according to cell line and condition.
- (B) Log<sub>2</sub>FC values of individual sgRNAs targeting B4galt1 according to cell line and condition.
- (C) Schematic of the single-guide CRISPR validation strategy
- (D) RCA I rhodamine staining intensity of MA cells after transduction with control sgRNA (sg Ctrl) or sgRNA targeting B4galt1. Controls are unstained cells or RCA I staining after trypsinization of cell-surface proteins.

## Supplementary table footnotes

**Table 1.** Z-score and p-values for every gene tested in the genome-wide CRISPR screens

**Table 2.** GSEA of genes essential only *in vivo*

**Table 3.** Median log<sub>2</sub>-fold change in sgRNA abundance (Log<sub>2</sub>FC) and p-values for every gene tested in the focused CRISPR validation screen

**Table 4.** In the focused validation screen, Log<sub>2</sub>FC and p-values for genes associated with immune response (GO\_0002376)

**Table 5.** AML-related MRs found to be activated or repressed in patient-derived samples with high expression of the clonal fitness signature, and whether they are essential in the focused CRISPR screen

**Table 6.** In AML patient cohorts, Cox regression analysis of the effect on overall survival of higher expression of genes found to be essential in CRISPR screens.
